# Supplementary material
Source: publisher figshare collection journal article supplement (https://tandf.figshare.com/articles/dataset/_/17081216)

**Supplementary Figure 2:** Correlation between the low confidence region (Asp193 to Glu245) in the modelled psCLU and AlphaFold CLU structures. The modelled psCLU structure shows refinement of the previously predicted loop region as  $\alpha$ -helices. STRIDE secondary structure predictions are indicated in tabular form.

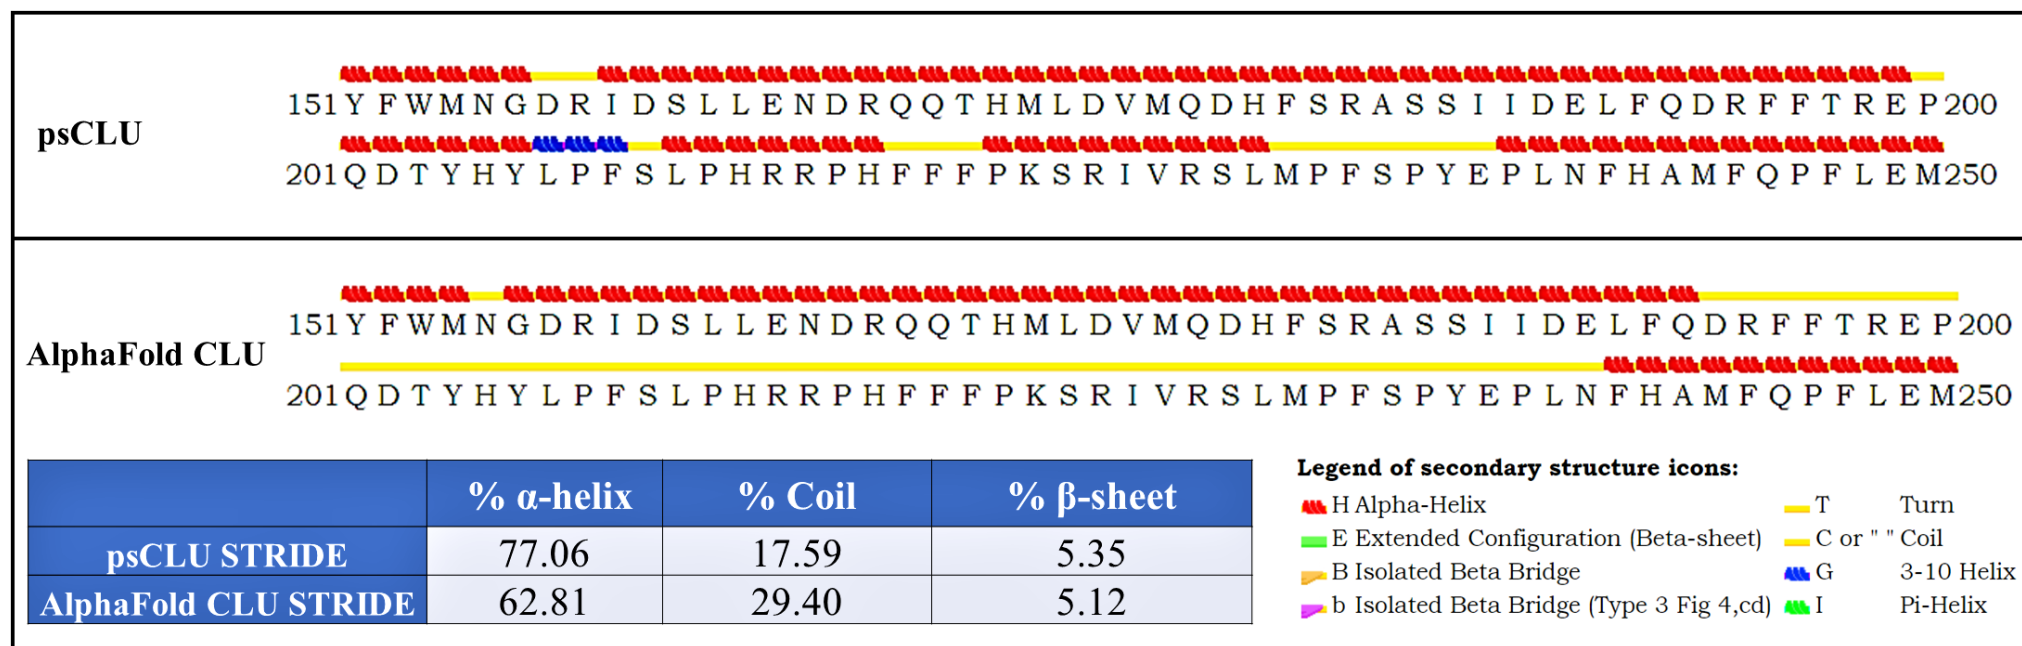

**Supplementary Figure 3:** Weak intramolecular interactions observed in psCLU mutations located in the functionally conserved regions. Protein structures have been captured at every 10ns of MD simulation. Panel (a) depicts the interactions observed in the wild type psCLU structure and panel (b) depicts the interactions in the mutant structure. Hydrogen bonds are depicted in green colored dotted lines. Hydrophobic interactions are denoted by red half circles.

### Glu45Lys mutation

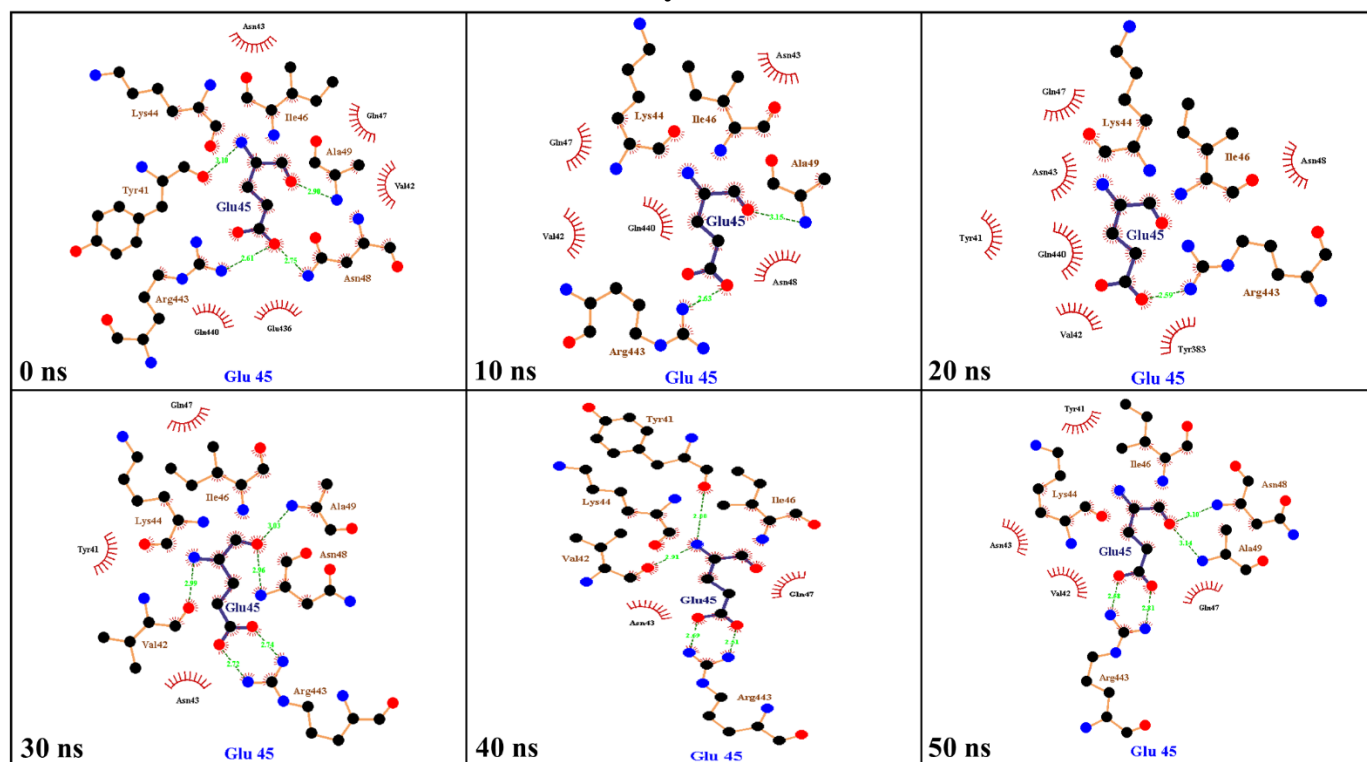

(a)

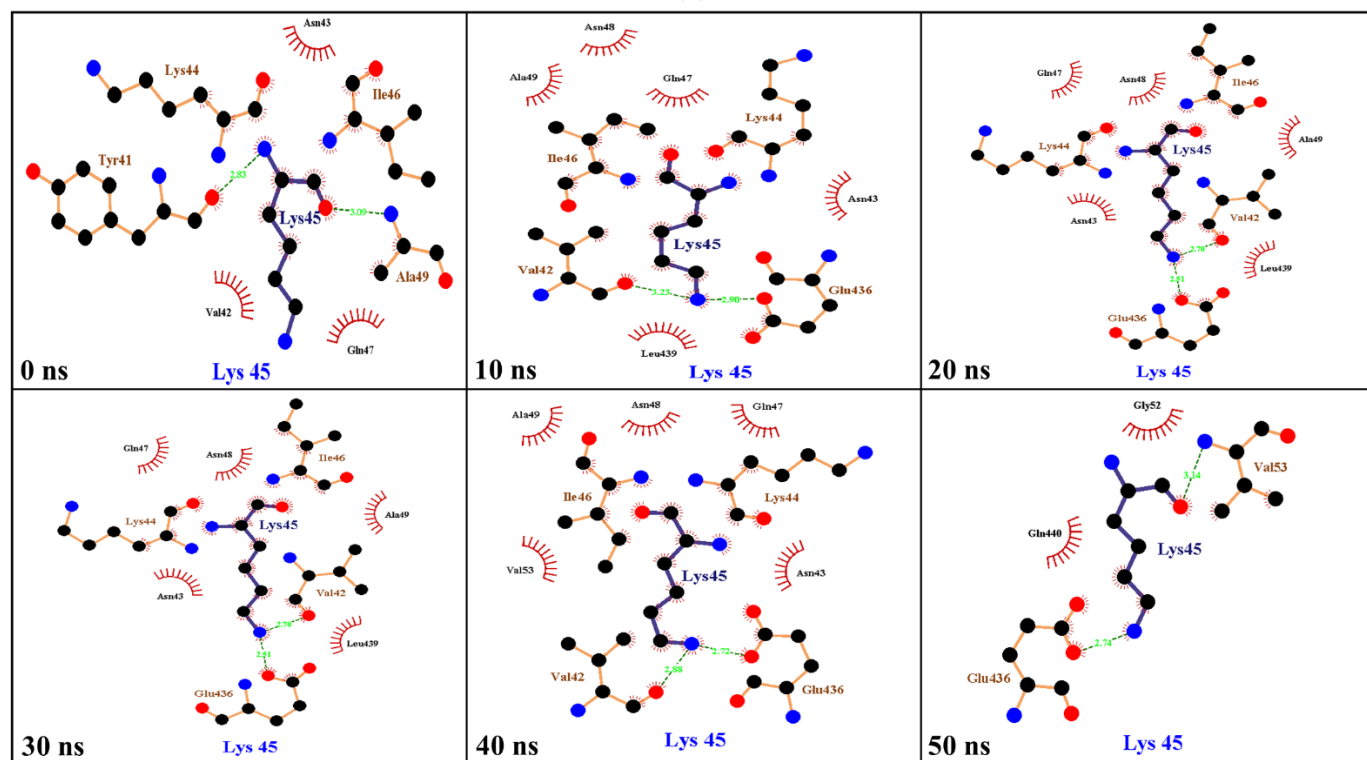

(b)

## Lys123Thr mutation

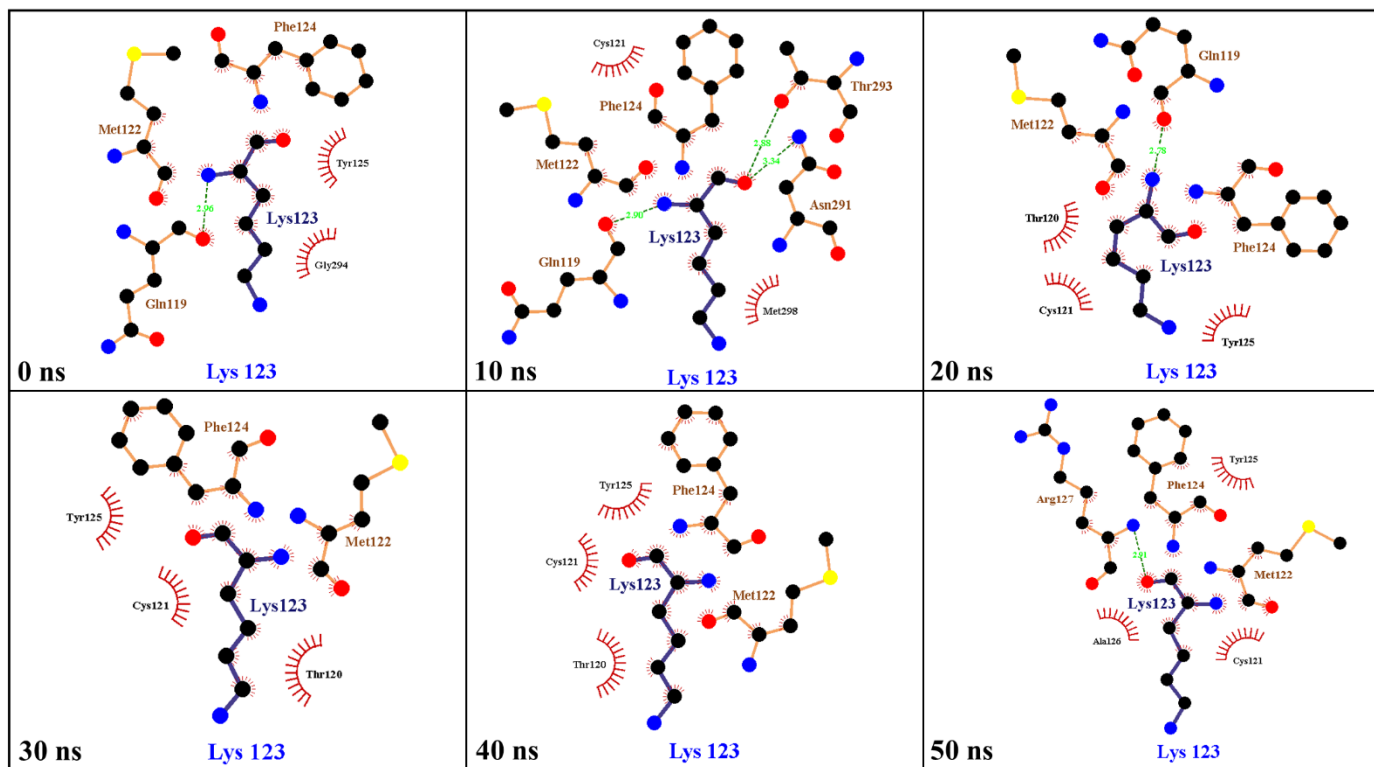

(a)

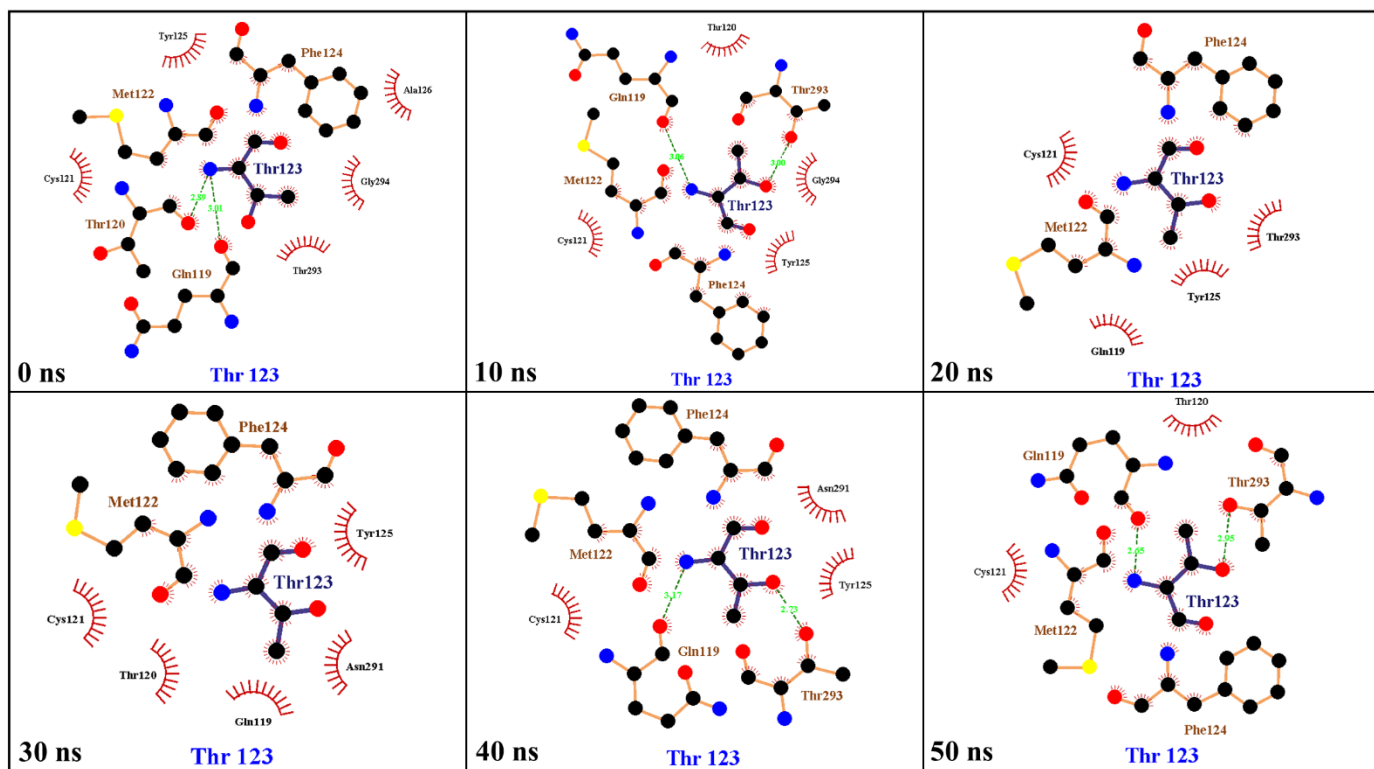

(b)

### Glu287Lys mutation

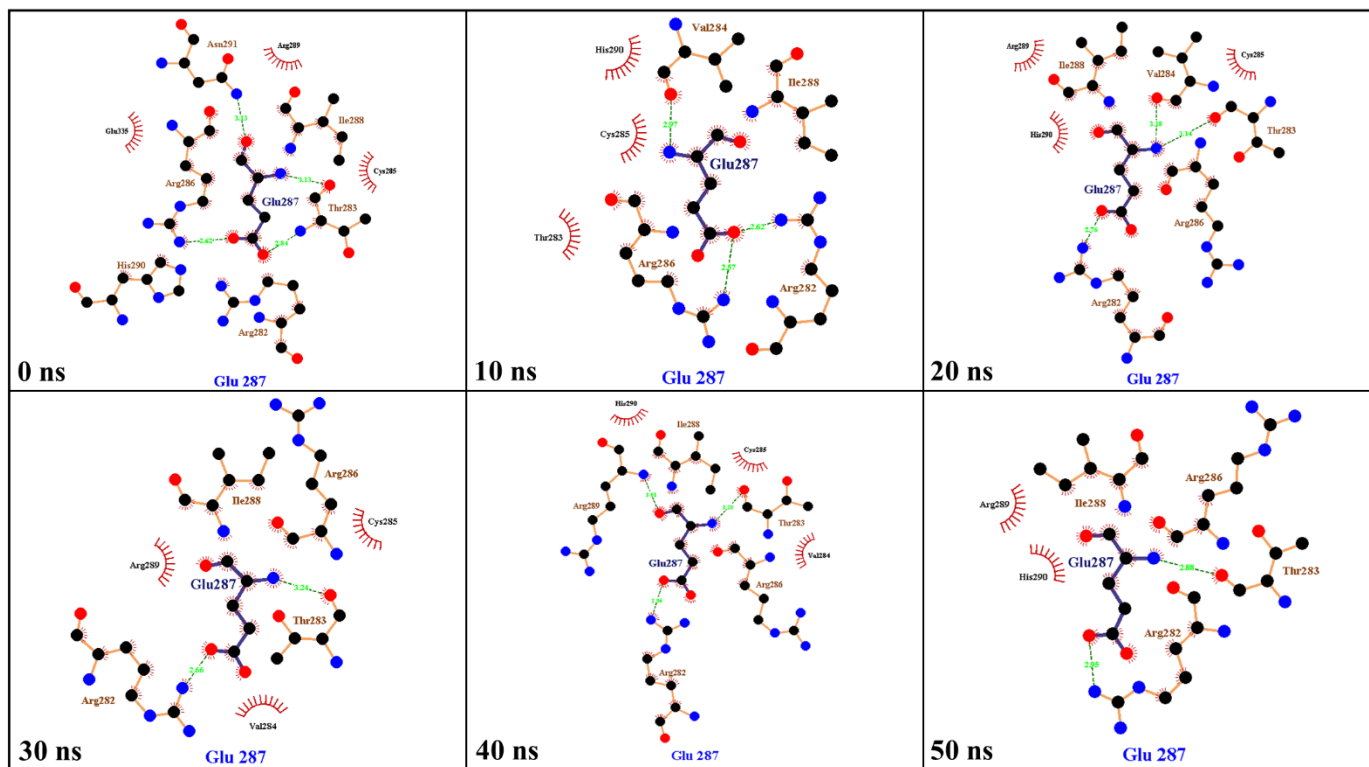

**(a)**

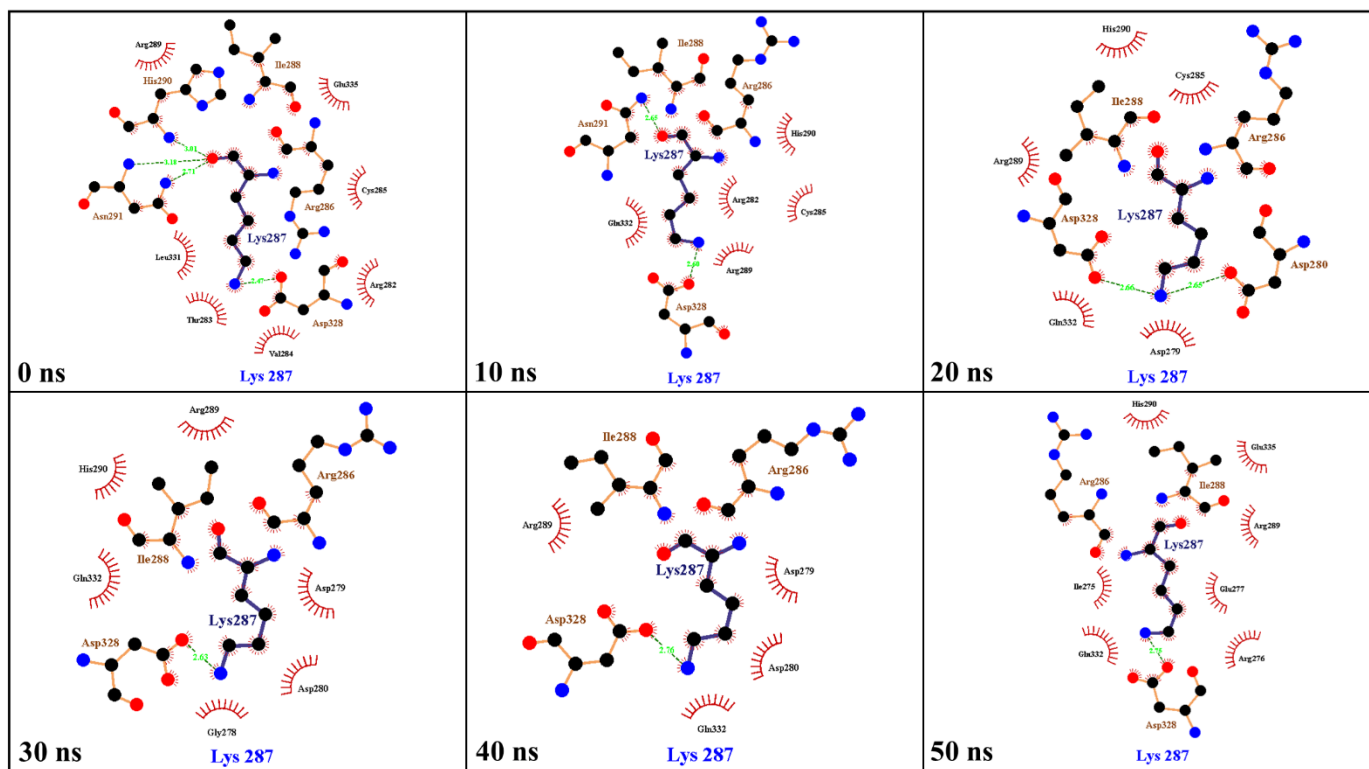

**(b)**



### Arg324Gln mutation

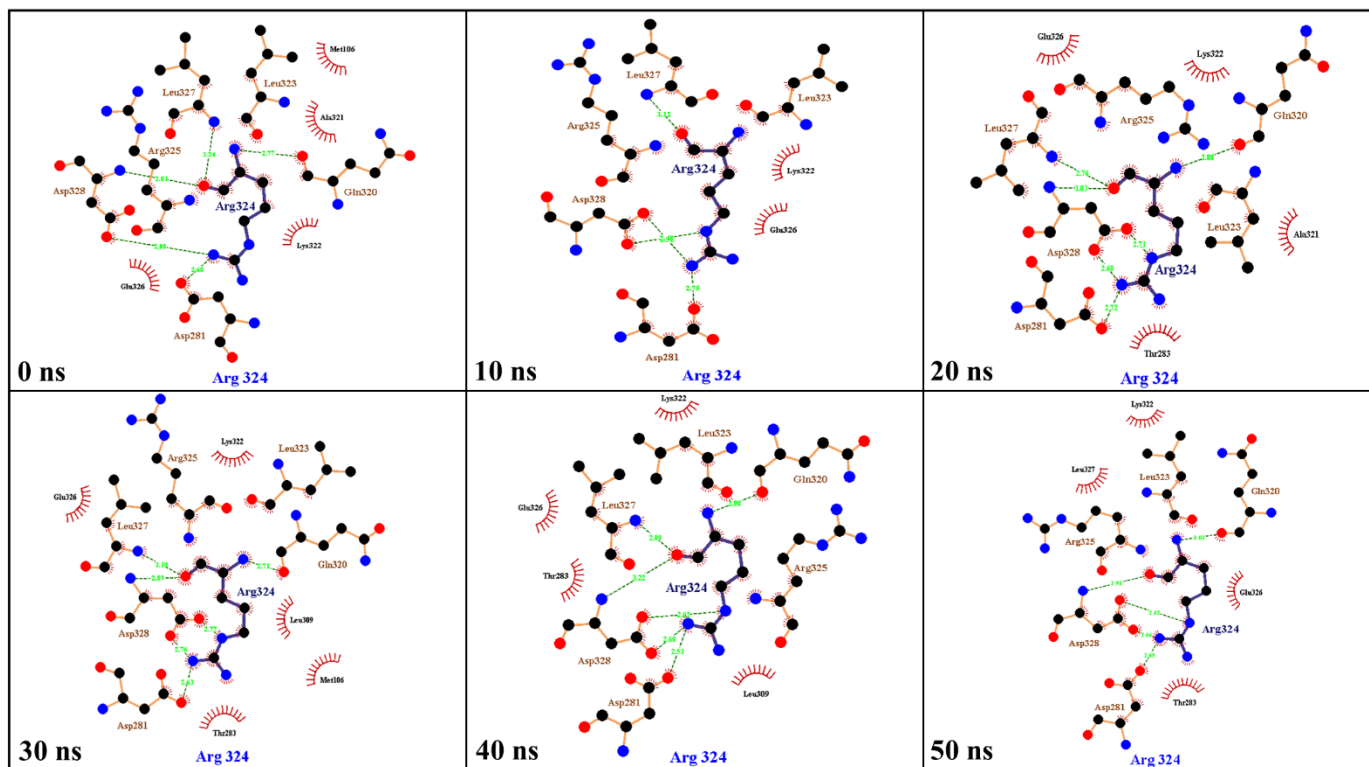

**(a)**

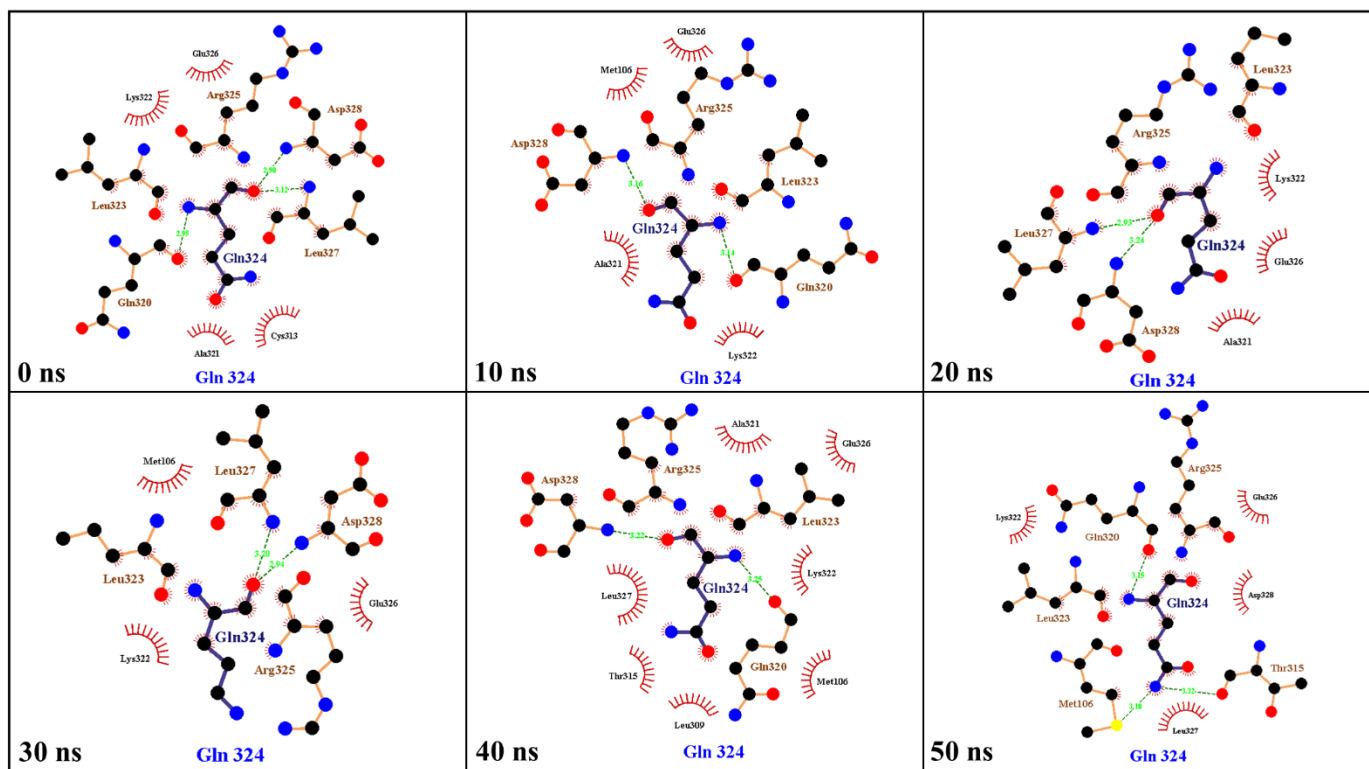

(b)

## Pro428His mutation

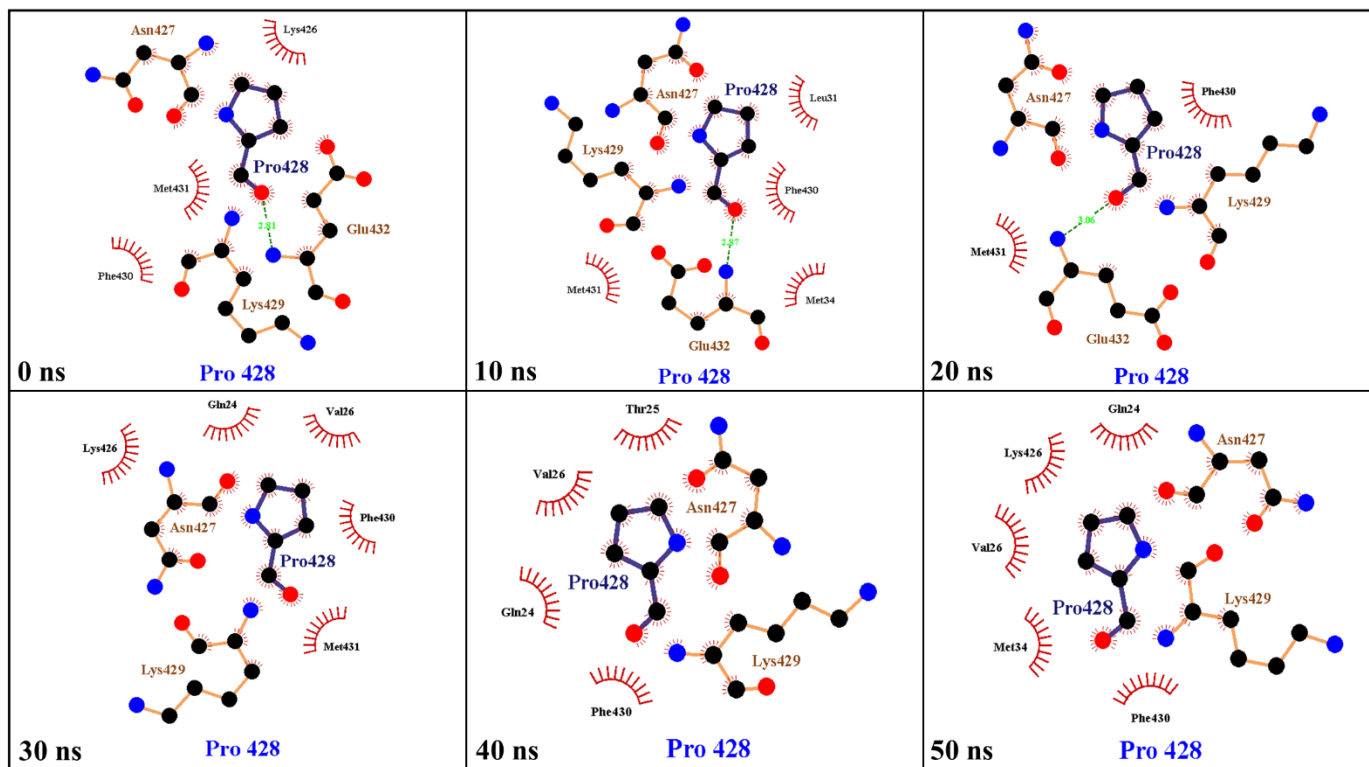

(a)

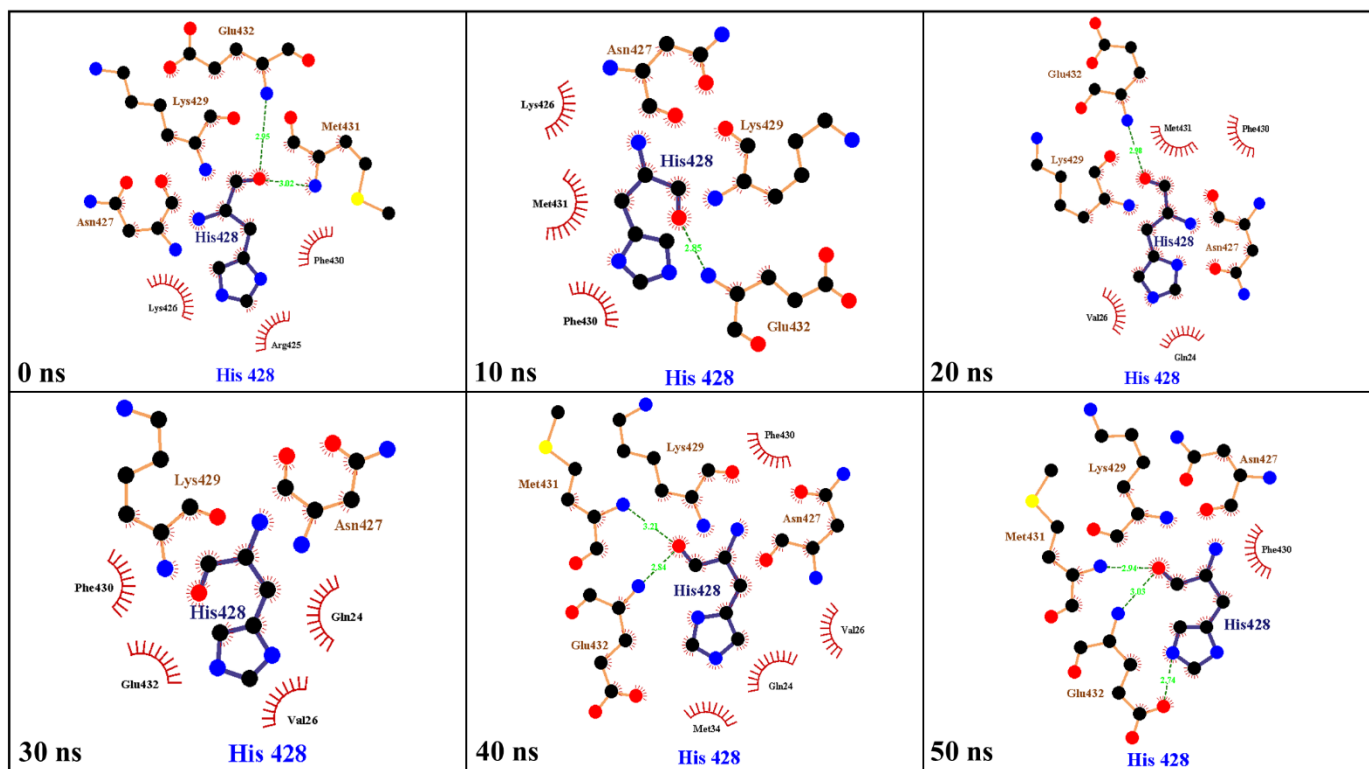

(b)

## Arg443His mutation

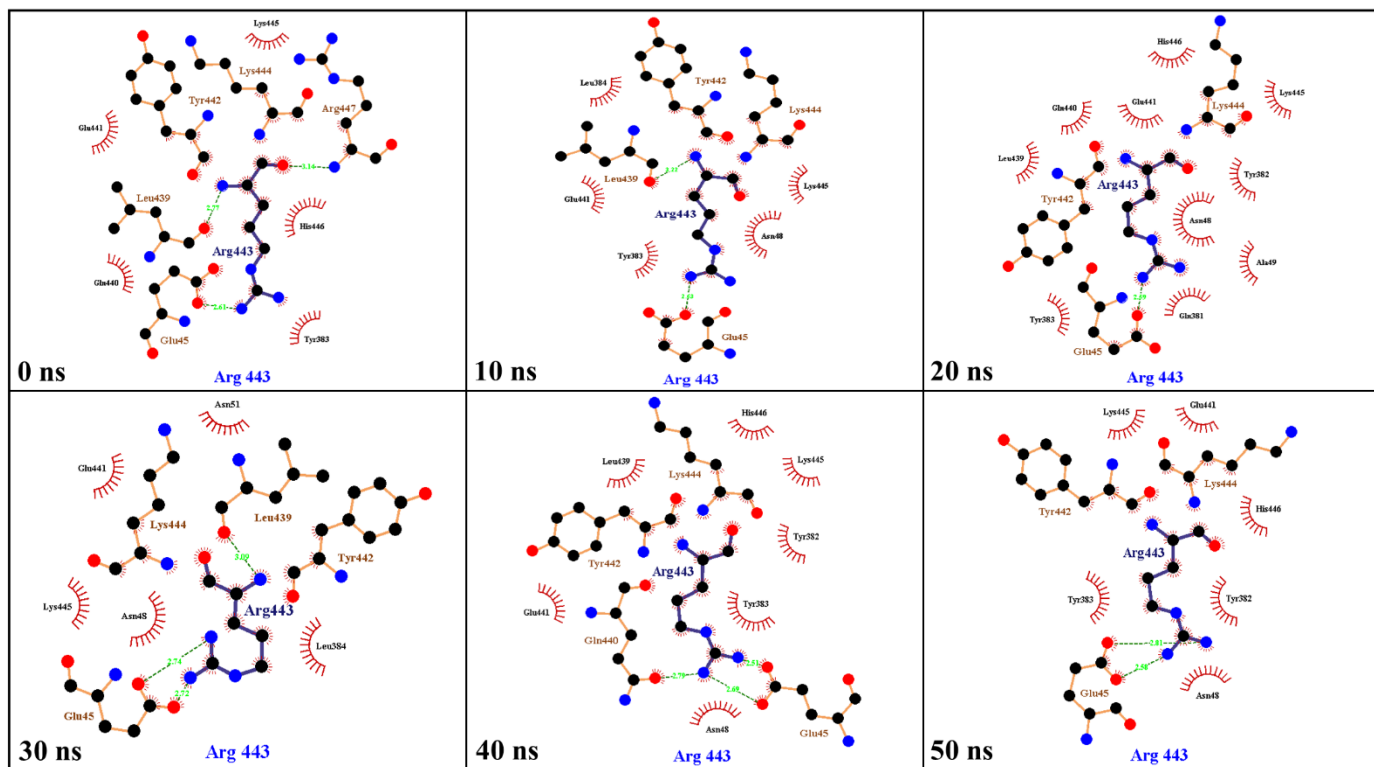

(a)

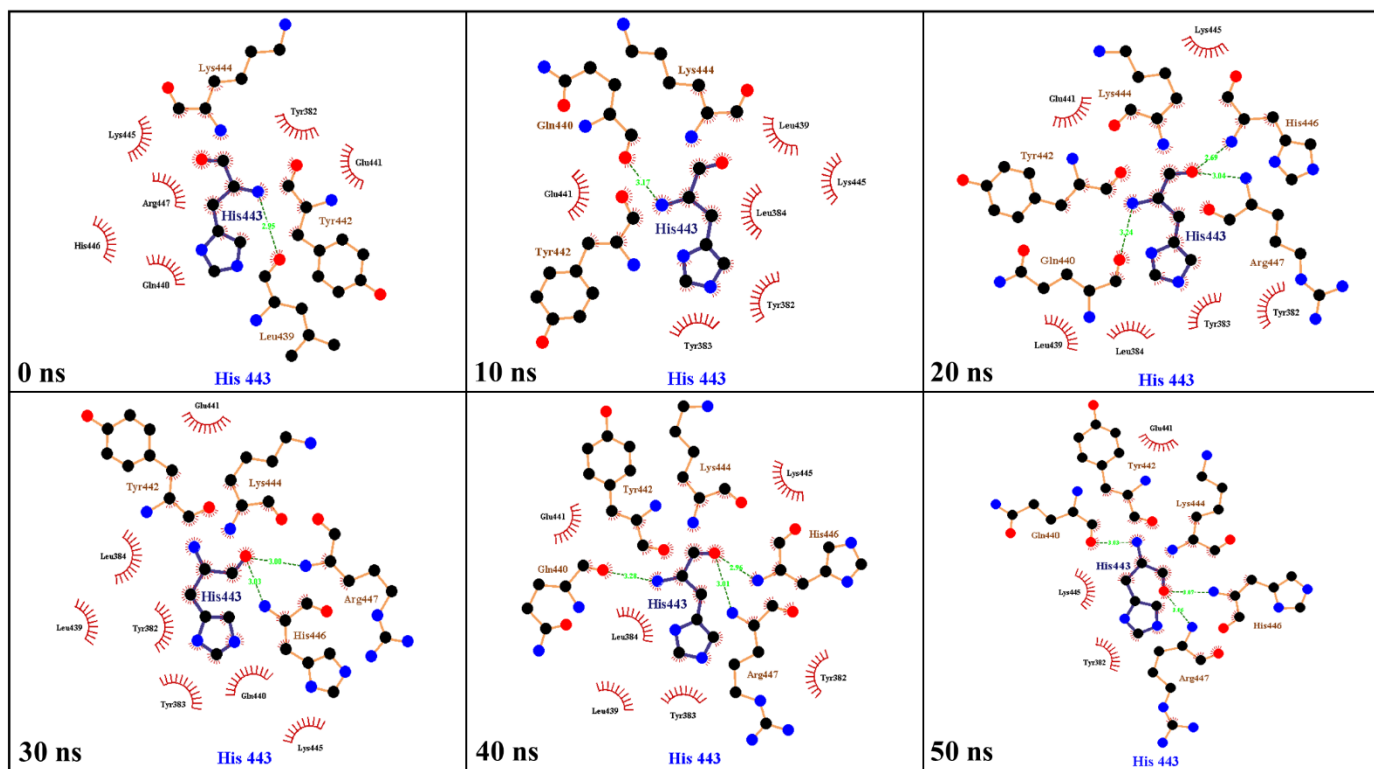

(b)



**Supplementary figure 4:** Weak intramolecular interactions observed in psCLU mutations located in the structurally conserved regions. Protein structures have been captured at every 10ns of MD simulation. Panel (a) depicts the interactions observed in the wild type psCLU structure and panel (b) depicts the interactions in the mutant structure. Hydrogen bonds are depicted in green colored dotted lines. Hydrophobic interactions are denoted by red half circles.

### Trp110Cys mutation

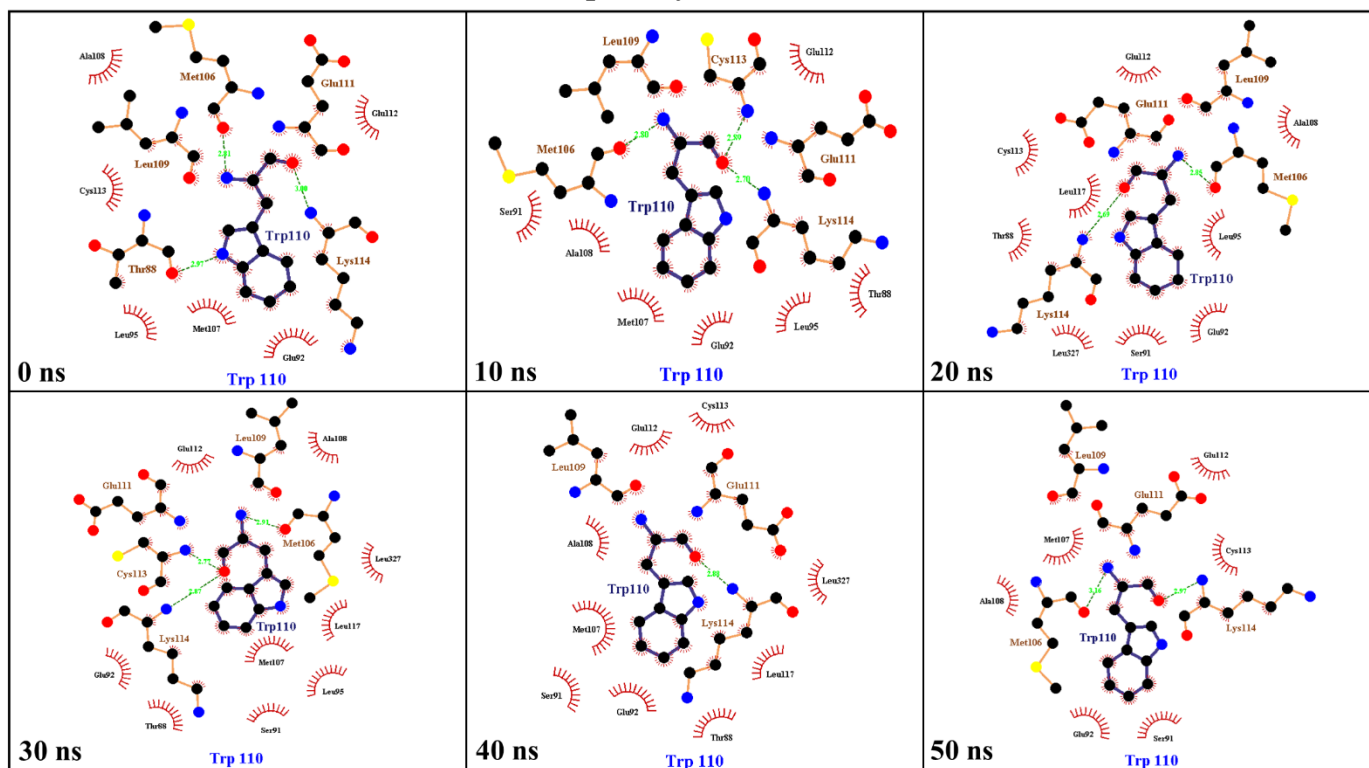

(a)

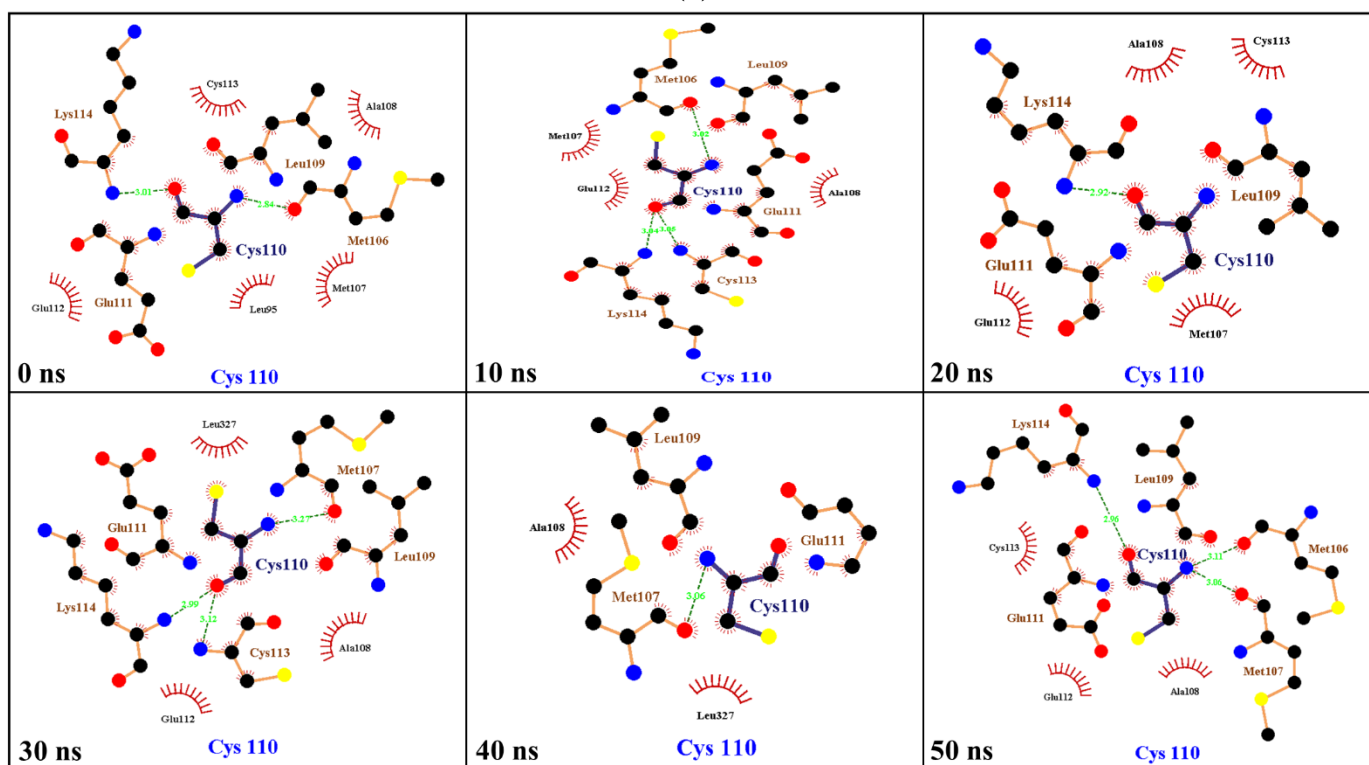

(b)

## Ile228Val mutation

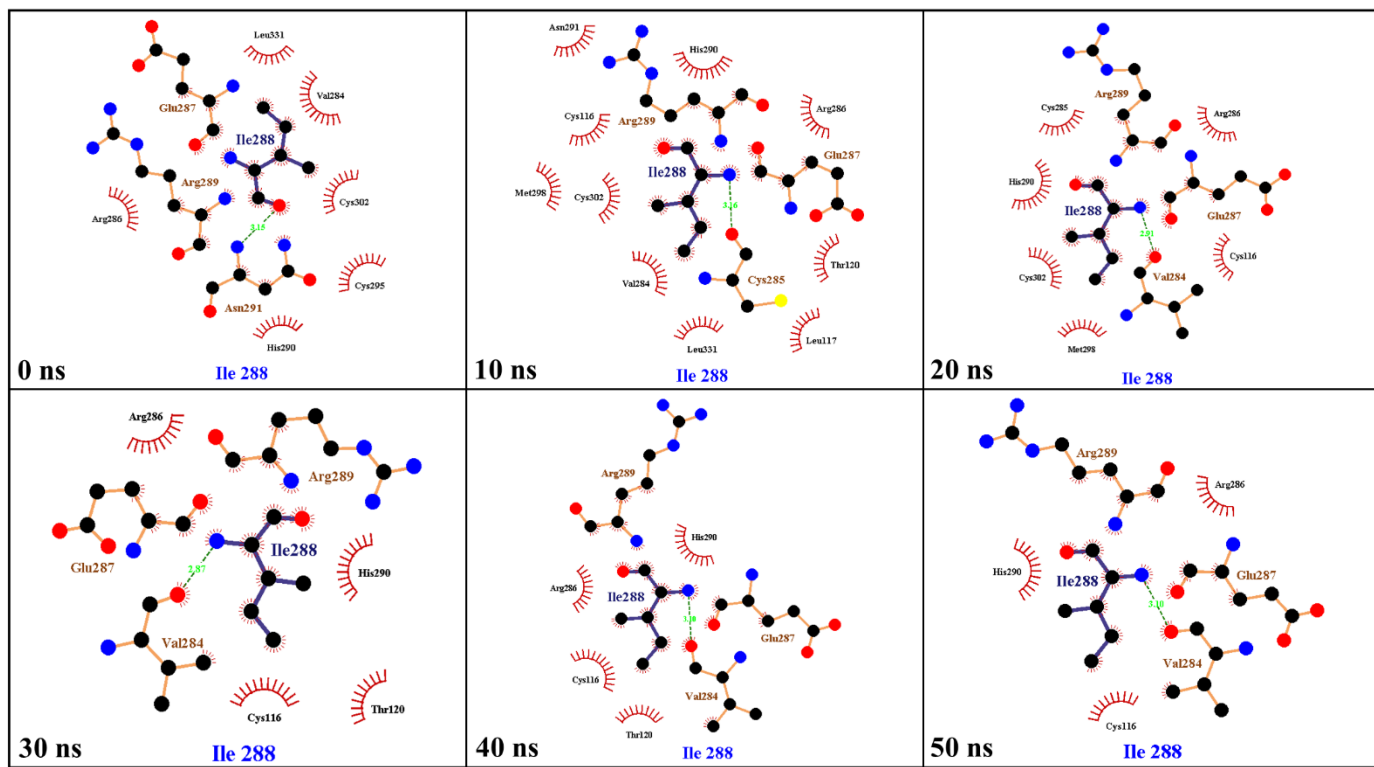

(a)

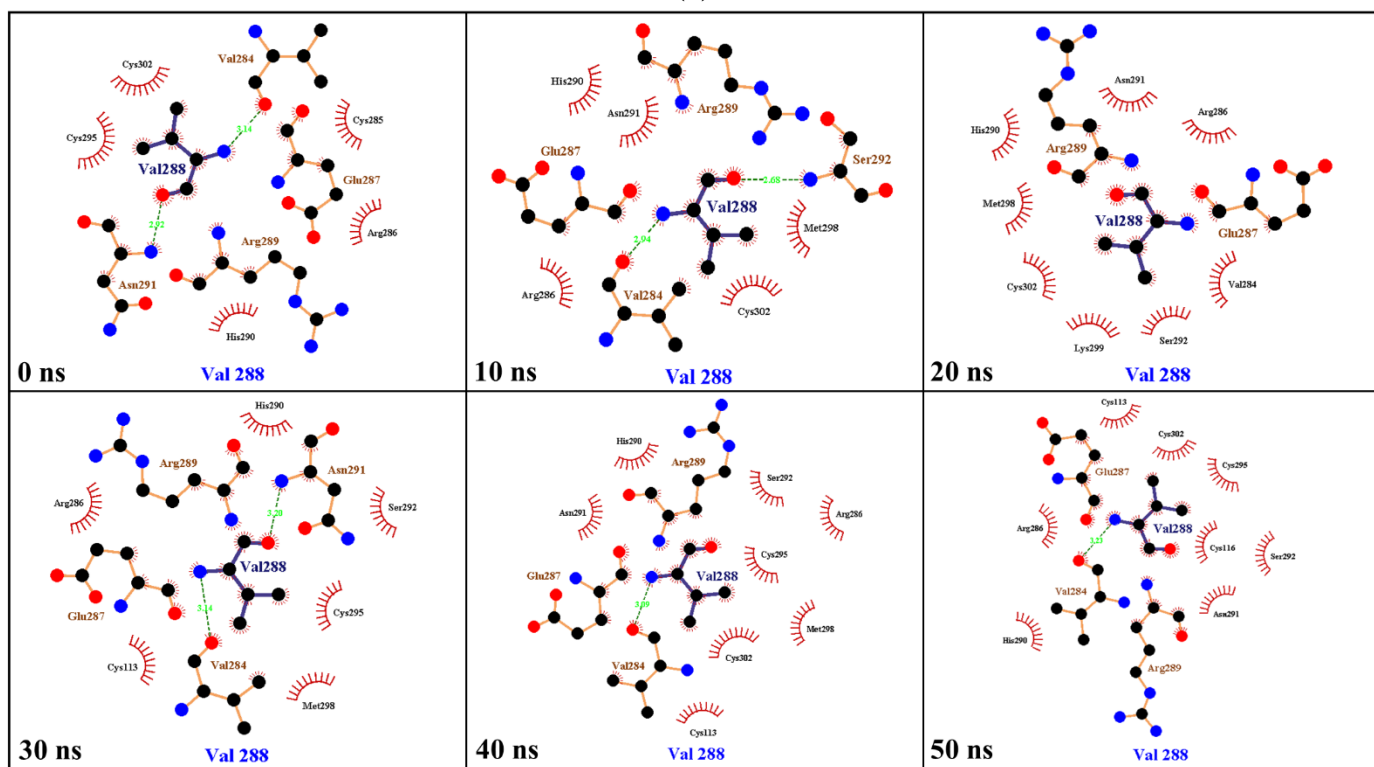

(b)

## Phe430Cys mutation

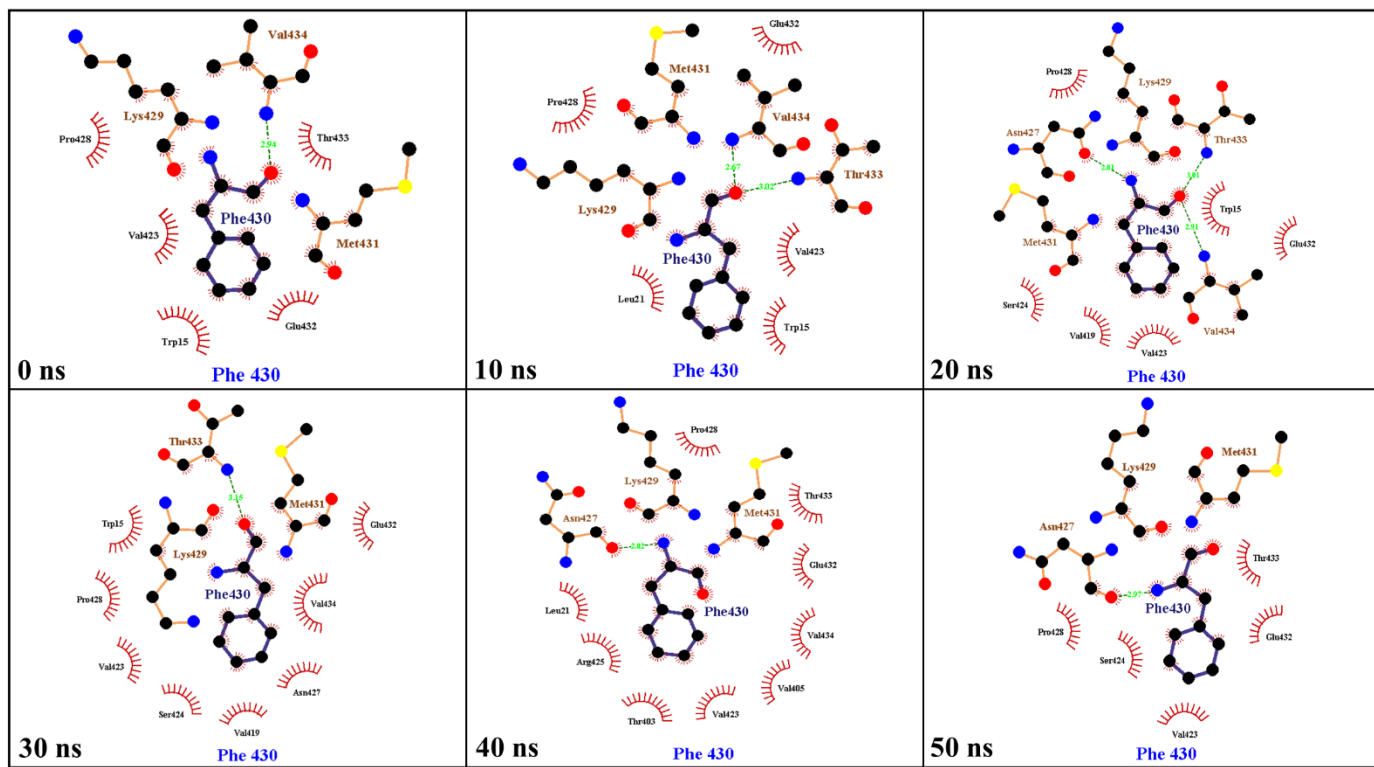

(a)

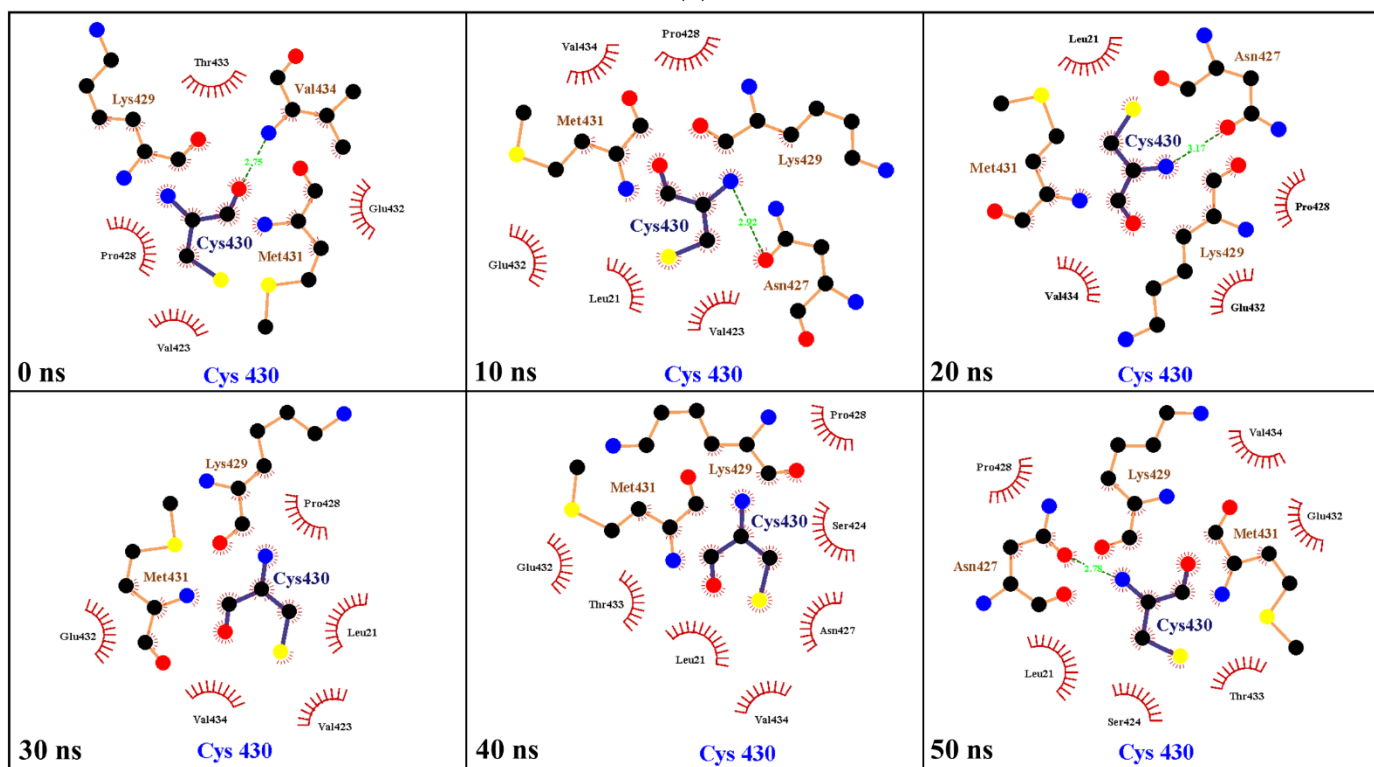

(b)

## Ala438Thr mutation

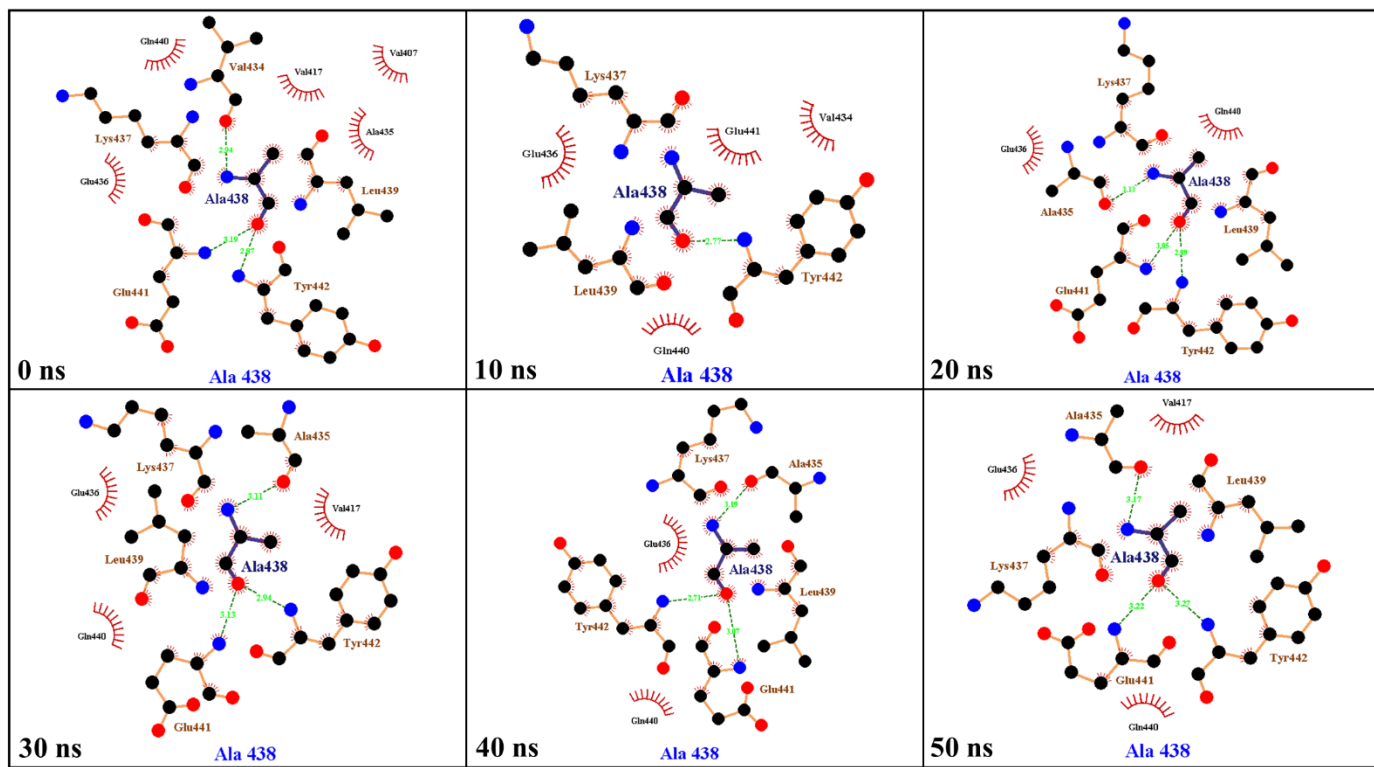

(a)

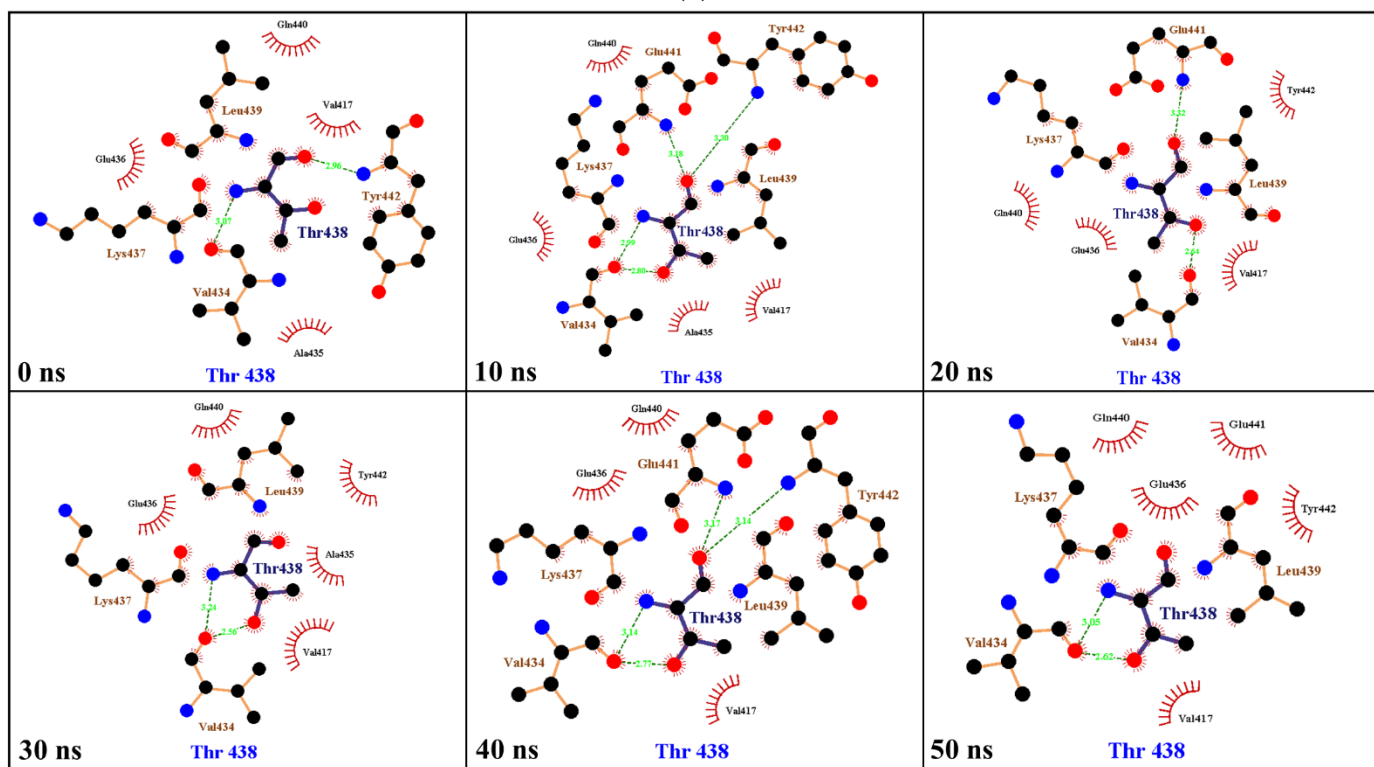

(b)



**Supplementary Figure 5:** Occupancy analysis of mutated residues across all trajectories as visualized in VMD. The differently colored spheres indicate the volume occupied by the atom during the simulation. Blue- maximum volume; Green-medium volume; Red-minimum volume.

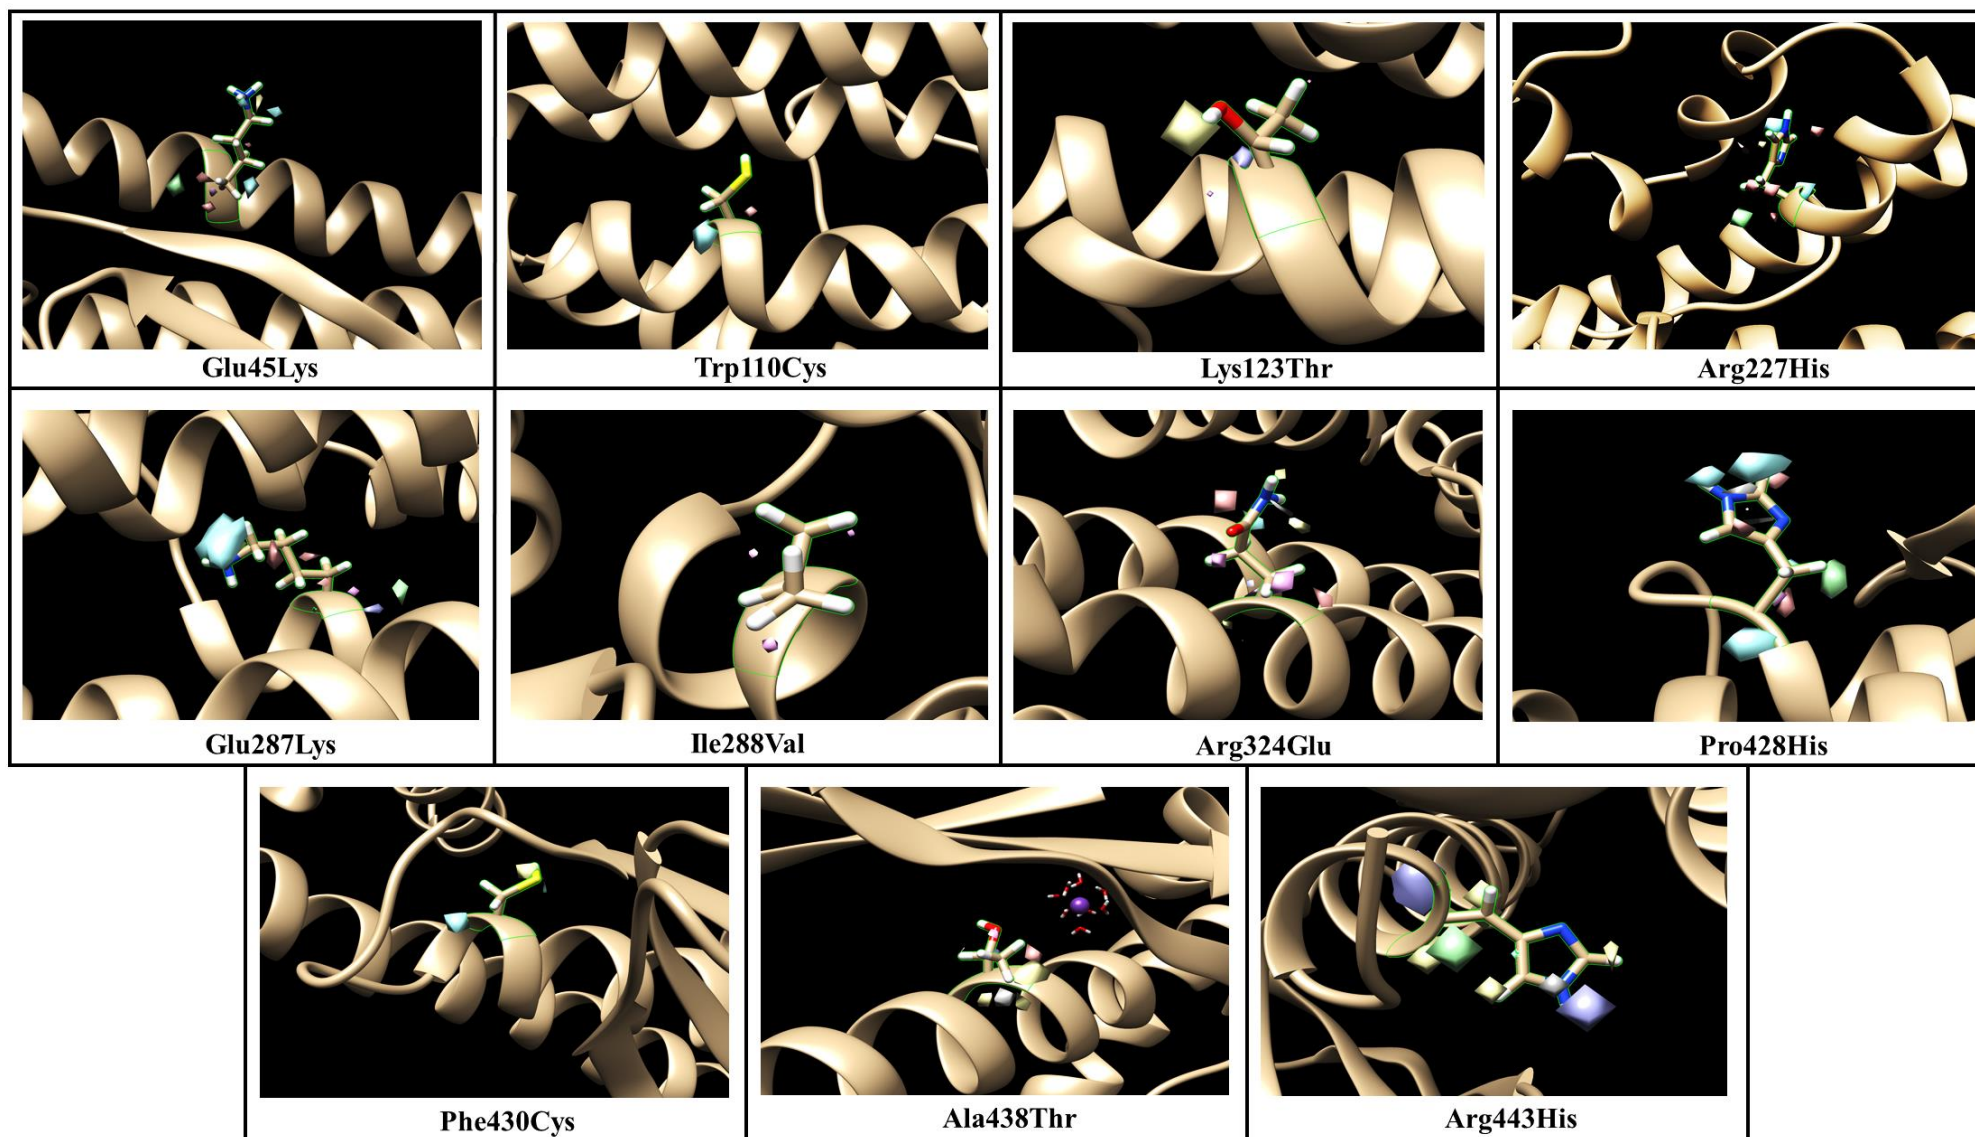

Supplement: Supplementary file 1 [file 1]
